# Supplementary material
Source: publisher figshare collection journal article supplement (https://tandf.figshare.com/articles/dataset/_/24045835)
Supplement: Supplementary file 1 [file 1]

**APPENDIX**


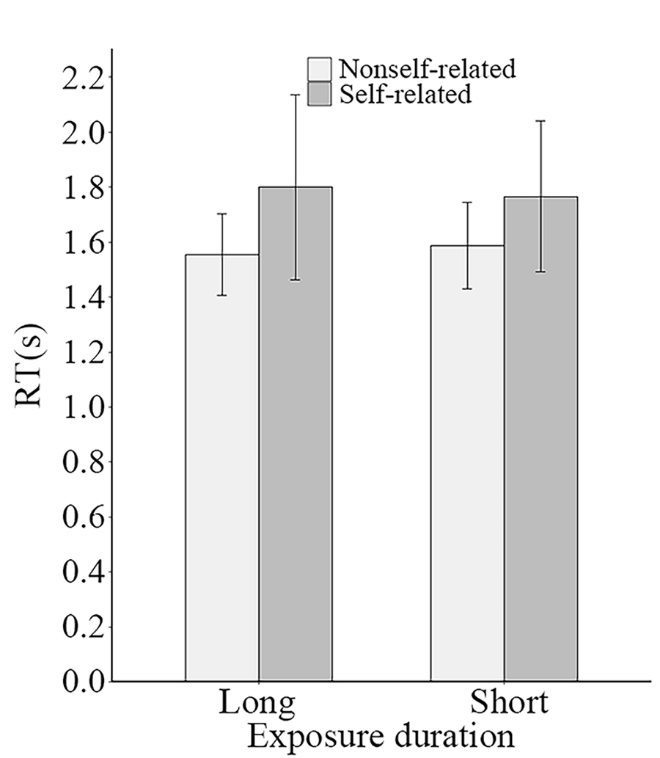


Figure A1. Mean RTs of different ringtones. The error bar depicts the 95% confidential interval.


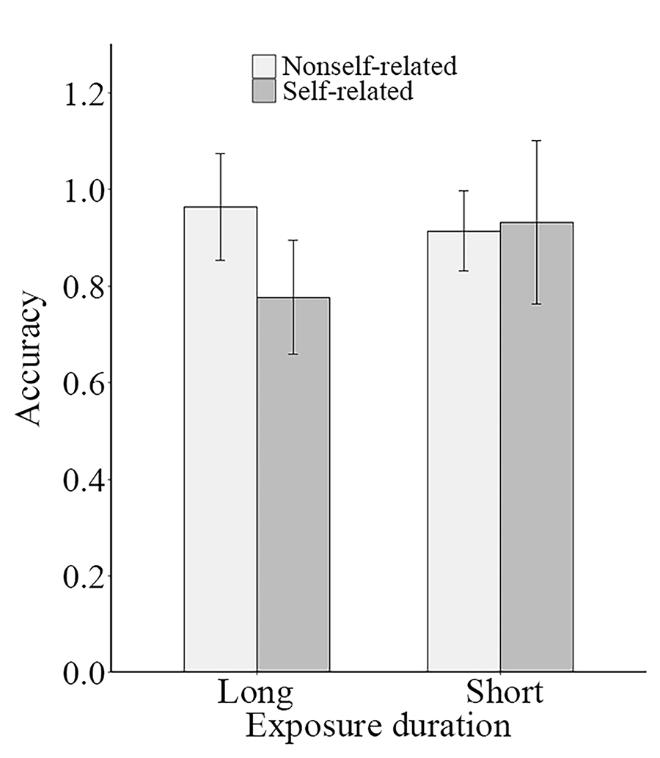


Figure A2. Mean accuracy of different ringtones**.** The error bar depicts the 95% confidential interval.
